# Supplementary material for: Compact designer TALENs for efficient genome engineering
Source: PubMed Central journal article supplement — Nat Commun. 2013 Apr 23;4:1762–. doi: 10.1038/ncomms2782 (PMC3644105; doi:10.1038/ncomms2782), 2013-04-23
Supplement: ncomms2782-s1.pdf [file ncomms2782-s1.pdf]

## Supplementary Figures

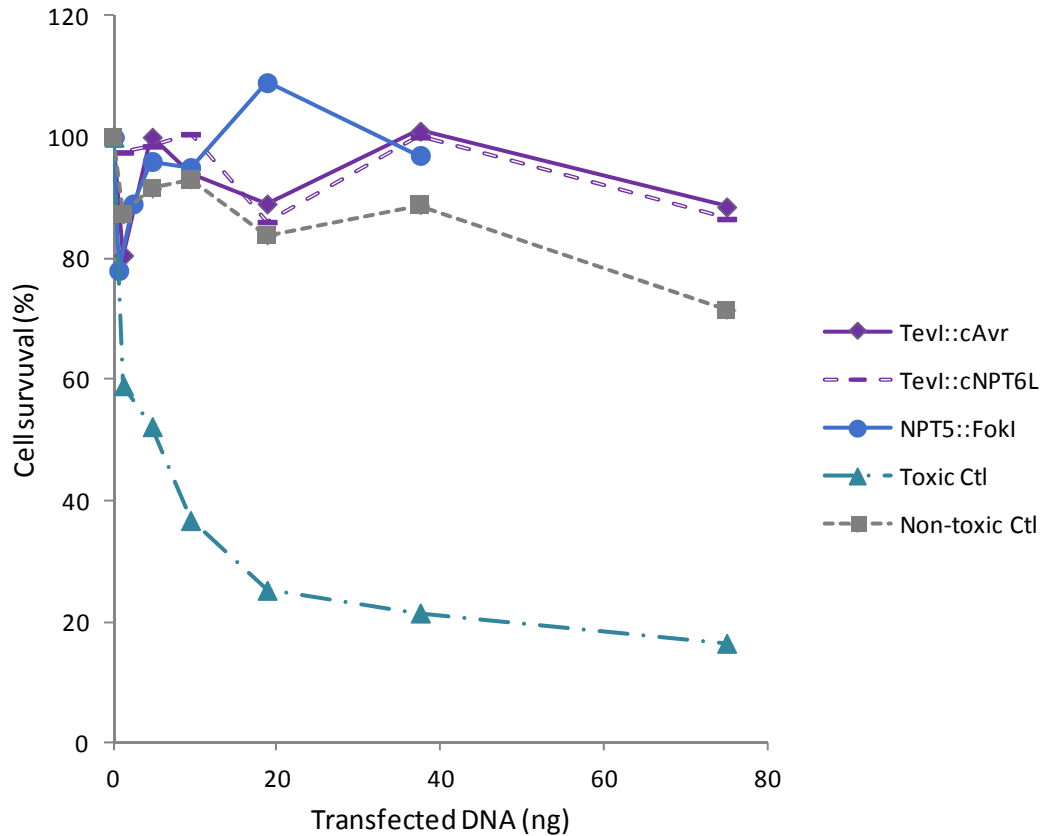

**Supplementary Figure S1 | Evaluation of TevI::TALE toxicity.** Various amounts (0 to 75 ng) of TALEN expression vector and a constant amount of GFP-encoding plasmid (10 ng) were used to co-transfect CHO-K1 cells ( $2.5 \times 10^3$  cells/well). Cell survival is expressed as the percentage of cells expressing GFP 6 days post transfection ( $n = 2$ ). TevI::cAvr, a compact TALEN targeting the AvrBs3 TALE binding site. TevI::cNPT6L, a compact TALEN targeting a site in the neomycin phosphotransferase II (*nptII*) gene. NPT5::FokI, a standard TALEN targeting a site that overlaps with cNPT6L in the *nptII* gene. Toxic Ctl, a meganuclease known to promote cell toxicity through non-specific cleavage. Non-toxic Ctl, the sequence-specific I-SceI meganuclease.

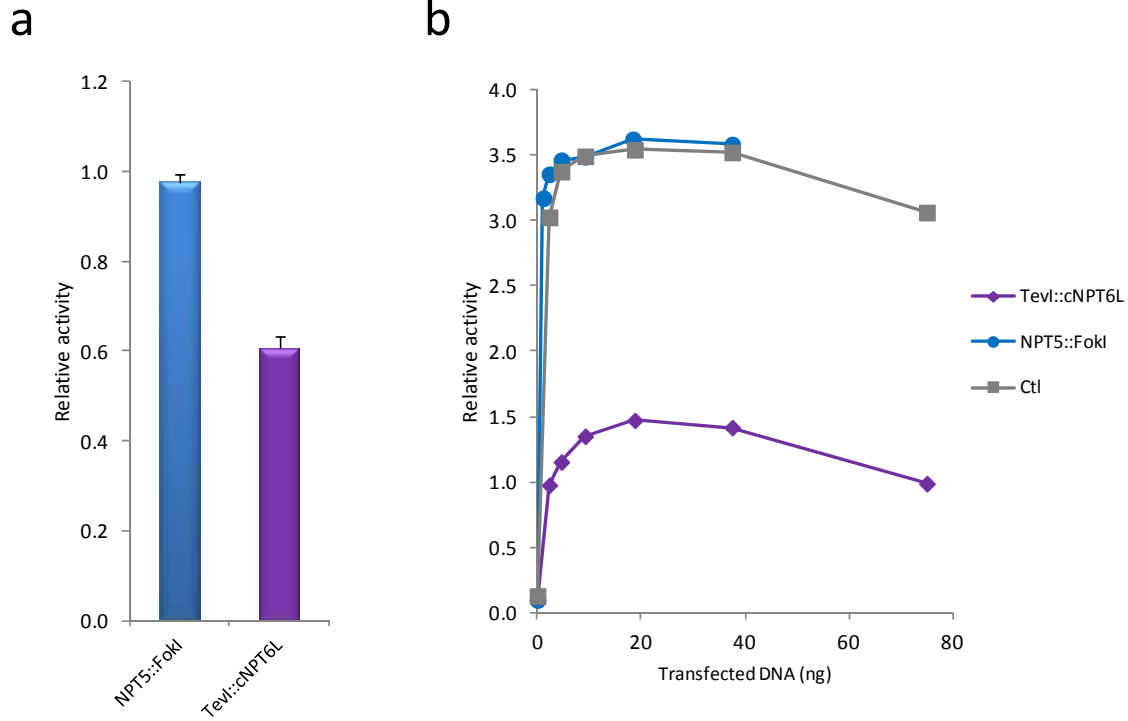

**Supplementary Figure S2 | *In vivo* characterization of TevI::cNPT6L activity.** (a) Yeast SSA assay comparing relative activity to a standard FokI-based TALEN (n = 3). Data are shown as the mean + s.e.m. (b) A dose-response SSA assay comparing relative activity to a standard FokI-based TALEN in CHO-K1 cells ( $2.5 \times 10^3$  cells/well). The NPT5 target (Fig. 1a) used in all assays (n = 2) contains the I-TevI cleavage sequence CGACGT. TevI::cNPT6L, a compact TALEN targeting a site in the neomycin phosphotransferase II (*nptII*) gene. NPT5::FokI, a standard TALEN targeting a site that overlaps with cNPT6L in the *nptII* gene. Ctl, the sequence-specific I-SceI meganuclease.

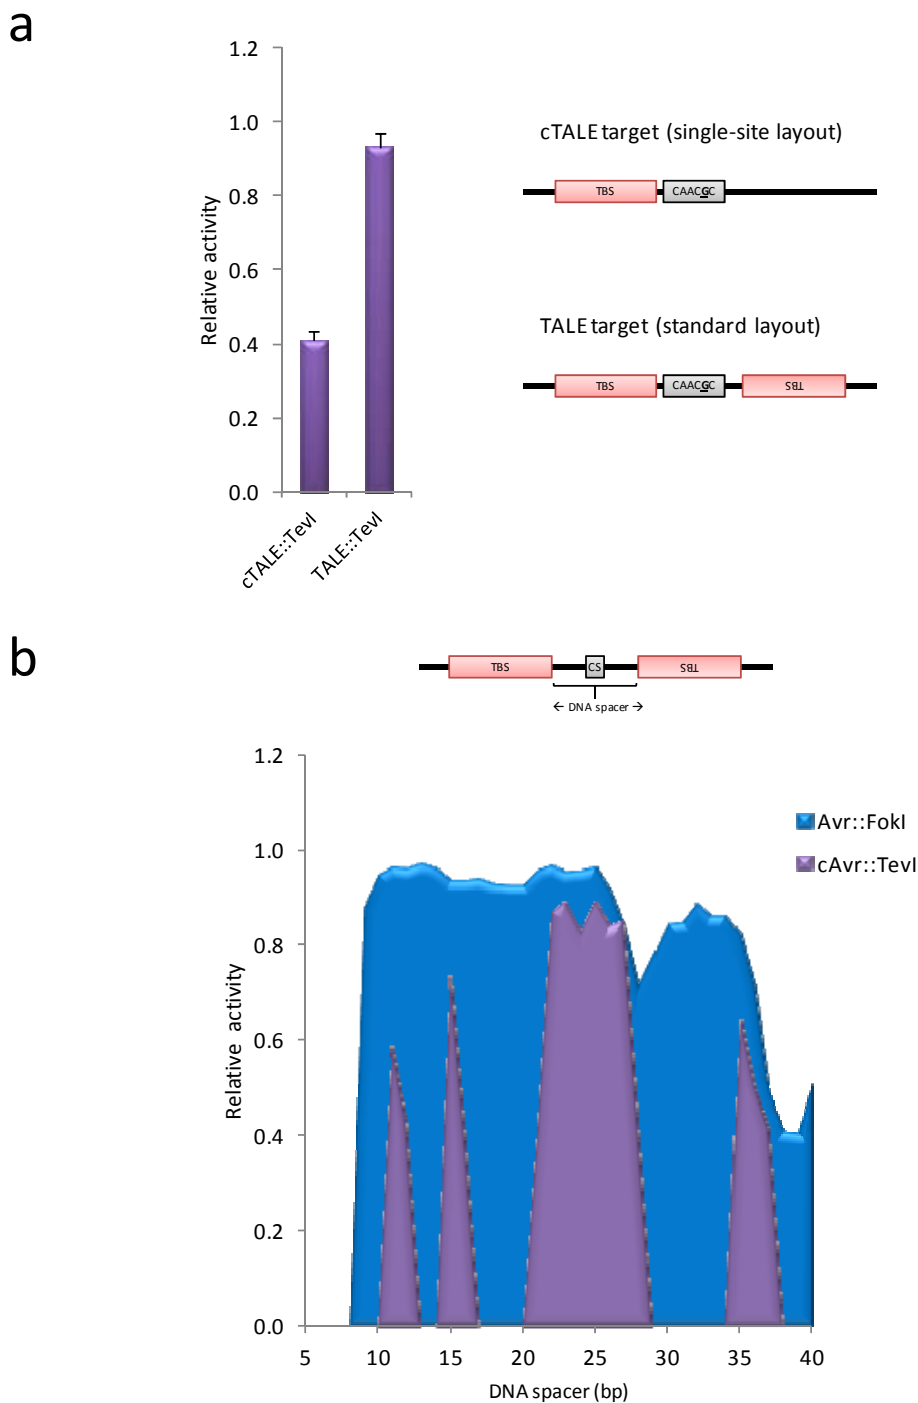

**Supplementary Figure S3 | TALE::TevI activity as a standard TALEN.** (a) Yeast SSA assay comparing the relative activity of monomeric (cAvr::TevI) vs. paired (TALE::TevI) versions of the TALE::TevI architecture ( $n = 3$ ). Data are shown as the mean + s.e.m. Schematic right, layout of single-site vs. standard TALE targets. A TevI cleavage sequence (CAACGC) is positioned 3' to the TALE binding site (TBS) to match the anticipated overlying protein configuration. (b) Relative paired TALE::TevI activity as a function of DNA spacer. A series of pseudo palindromic targets (top schematic) were generated that contain two identical AvrBs3 recognition sequences juxtaposed with the 3' ends proximal (tail-to-tail) and separated by spacer DNA ranging from 5 to 40 bp. On these targets, both Avr::FokI and cAvr::TevI function as standard TALEN configurations targeting the AvrBs3 TALE binding site. Relative activity based on a yeast SSA assay at 37°C ( $n = 3$ ).

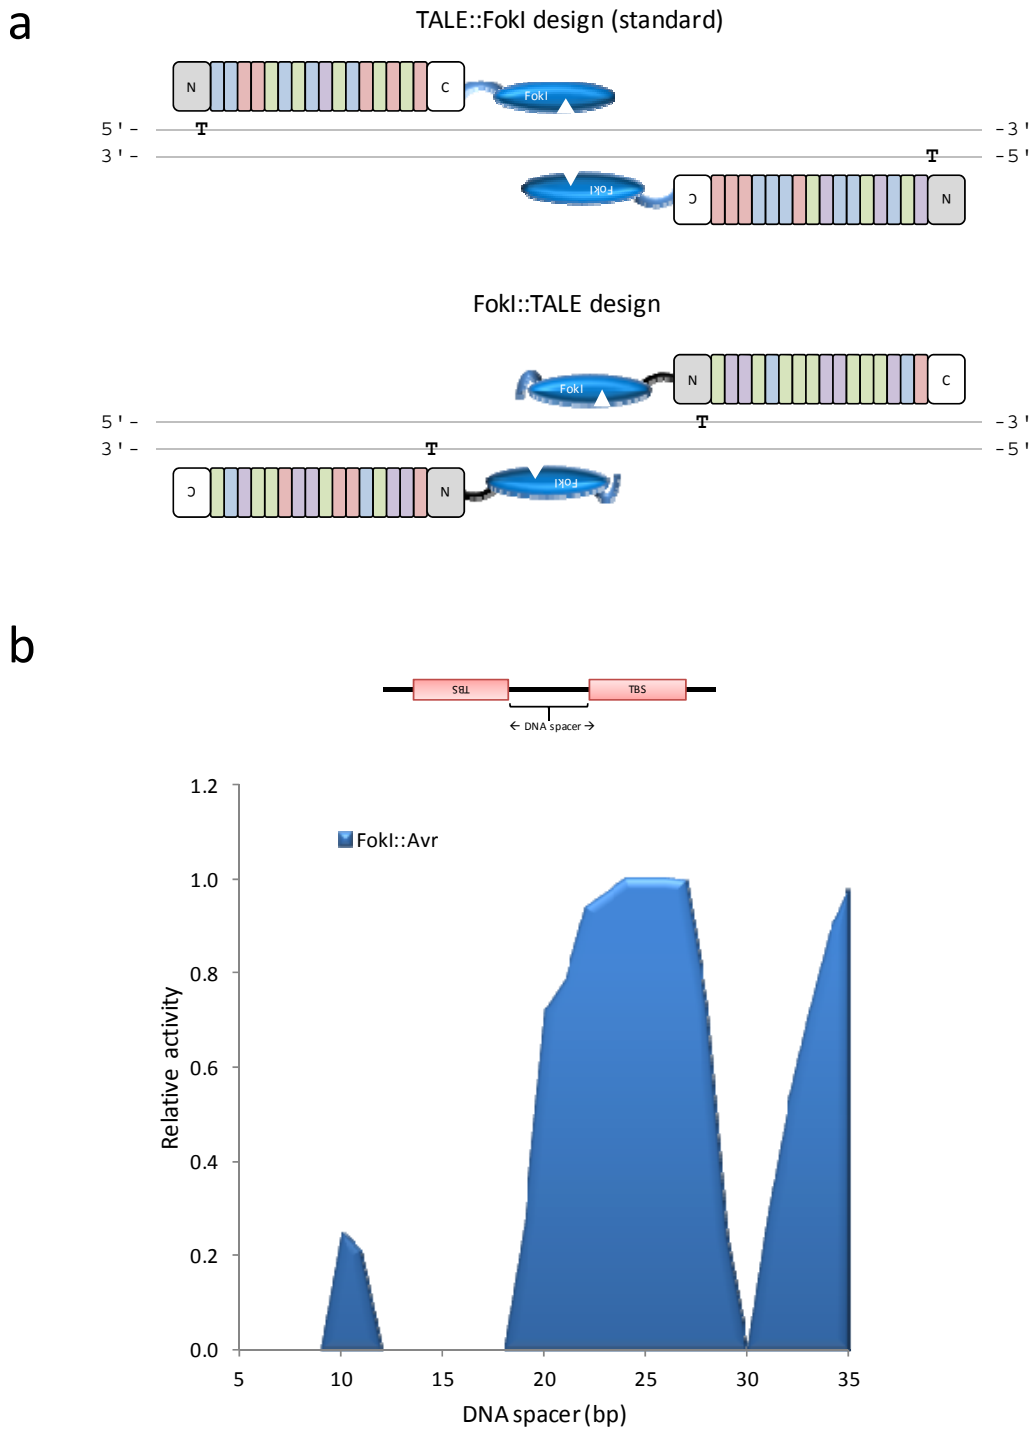

**Supplementary Figure S4 | Design and preliminary characterization of FokI::TALE.** (a) Schematic illustrating the differences in protein layout and target site configuration for standard TALE::FokI vs. FokI::TALE constructs. Notably, the FokI catalytic domain in FokI::TALE is fused N-terminally, which is inverted relative to its natural context (C-terminal) within wild-type FokI and standard TALENs. (b) Relative FokI::TALE activity as a function of DNA spacer. A series of pseudo palindromic targets (top schematic) were generated that contain two identical AvrBs3 recognition sequences juxtaposed with the 5' ends proximal (head-to-head) and separated by spacer DNA ranging from 5 to 35 bp. FokI::Avr functions in a standard TALEN configuration. Relative activity based on a yeast SSA assay at 37°C (n = 3).

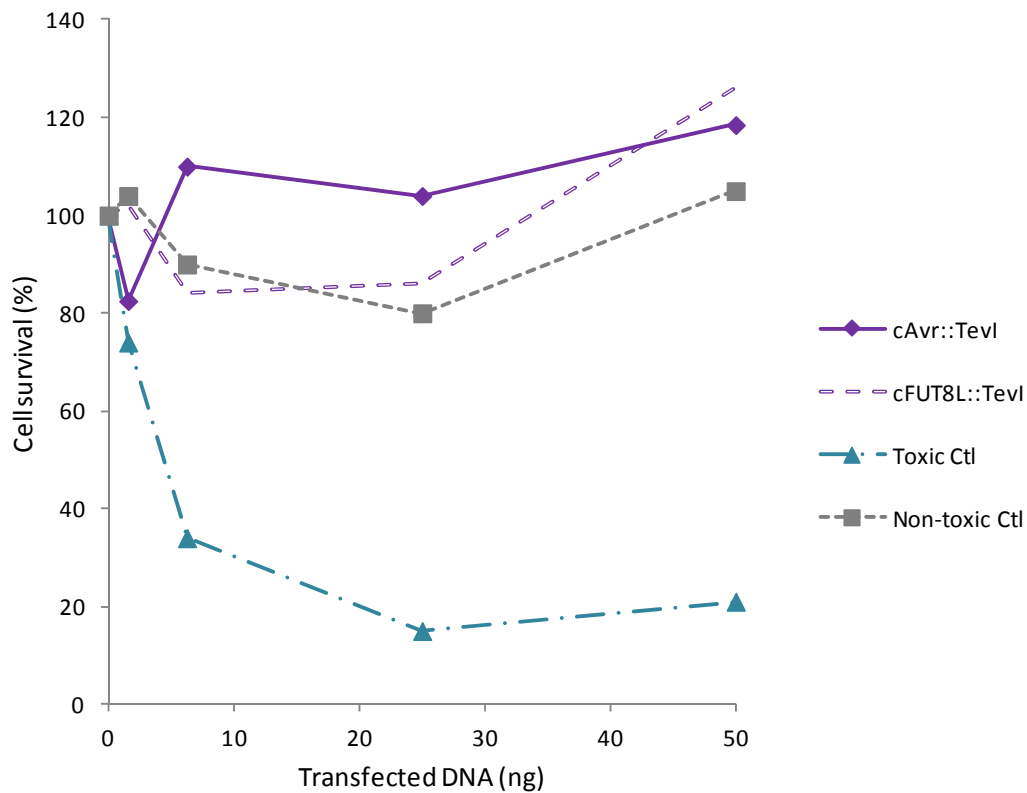

**Supplementary Figure S5 | Evaluation of TALE::TevI toxicity.** Various amounts (0 to 50 ng) of TALEN expression vector and a constant amount of GFP-encoding plasmid (10 ng) were used to co-transfect CHO-K1 cells ( $2.5 \times 10^3$  cells/well). Cell survival is expressed as the percentage of cells expressing GFP 6 days post transfection ( $n = 2$ ). cAvr::TevI, a compact TALEN targeting the AvrBs3 TALE binding site. cFUT8L::TevI, a compact TALEN targeting a site in alpha1-6-fucosyltransferase (*fut8*) gene. Toxic Ctl, a meganuclease known to promote cell toxicity through non-specific cleavage. Non-toxic Ctl, a sequence-specific meganuclease.

> Avr::FokI

MVDLRTLGYSSQQQEQEKIKPKVRSSTVAQHHEALVGHGFTHAHI VALSQHPAALGTVAVKYQDMIAALPEAT  
HEAIVGVGKQWSGARALEALLTVAGELRGPPLQLDTGQLLKI AKRGGVTAVEAVHAWRNALTGAPLN  
LTPEQVVAIASHDGGKQALETVQRLLPVLCQAHG  
LTPQQVVAIASNNGGGKQALETVQRLLPVLCQAHG  
LTPEQVVAIASNI GGKQALETVQALLPVLCQAHG  
LTPQQVVAIASNNGGGKQALETVQRLLPVLCQAHG  
LTPEQVVAIASNI GGKQALETVQALLPVLCQAHG  
LTPEQVVAIASNI GGKQALETVQALLPVLCQAHG  
LTPEQVVAIASNI GGKQALETVQALLPVLCQAHG  
LTPEQVVAIASHDGGKQALETVQRLLPVLCQAHG  
LTPEQVVAIASHDGGKQALETVQRLLPVLCQAHG  
LTPQQVVAIASNNGGGKQALETVQRLLPVLCQAHG  
LTPEQVVAIASNI GGKQALETVQALLPVLCQAHG  
LTPEQVVAIASNI GGKQALETVQALLPVLCQAHG  
LTPEQVVAIASHDGGKQALETVQRLLPVLCQAHG  
LTPEQVVAIASHDGGKQALETVQRLLPVLCQAHG  
LTPQQVVAIASNNGGGKQALETVQRLLPVLCQAHG  
LTPEQVVAIASHDGGKQALETVQRLLPVLCQAHG  
LTPQQVVAIASNNGGRP ALE SIVAQLSRPDPGSSGPNRGGVTKQLVKSELEEKKSELRHKLKYVPHEYIEL  
TEIARNSTQDRILEMKVMEFFMKVYGYRGKHLGGSRKPDGAIYTVGSPIDYGVIVDTKAYSGGYNLPIGQ  
ADEMQRVVEENQTRNKHINPNEWKVPSSVTEFKFLFVSGHFKGNKYKAQLTRLNHI TNCNGAVLSVEEL  
LIGGEMIKAGTLTLEEVRKFNNGEINF GSSAD

> cAvr::TevI

MVDLRTLGYSSQQQEQEKIKPKVRSSTVAQHHEALVGHGFTHAHI VALSQHPAALGTVAVKYQDMIAALPEAT  
HEAIVGVGKQWSGARALEALLTVAGELRGPPLQLDTGQLLKI AKRGGVTAVEAVHAWRNALTGAPLN  
LTPEQVVAIASHDGGKQALETVQRLLPVLCQAHG  
LTPQQVVAIASNNGGGKQALETVQRLLPVLCQAHG  
LTPEQVVAIASNI GGKQALETVQALLPVLCQAHG  
LTPQQVVAIASNNGGGKQALETVQRLLPVLCQAHG  
LTPEQVVAIASNI GGKQALETVQALLPVLCQAHG  
LTPEQVVAIASNI GGKQALETVQALLPVLCQAHG  
LTPEQVVAIASNI GGKQALETVQALLPVLCQAHG  
LTPEQVVAIASHDGGKQALETVQRLLPVLCQAHG  
LTPEQVVAIASHDGGKQALETVQRLLPVLCQAHG  
LTPQQVVAIASNNGGGKQALETVQRLLPVLCQAHG  
LTPEQVVAIASNI GGKQALETVQALLPVLCQAHG  
LTPEQVVAIASNI GGKQALETVQALLPVLCQAHG  
LTPEQVVAIASHDGGKQALETVQRLLPVLCQAHG  
LTPEQVVAIASHDGGKQALETVQRLLPVLCQAHG  
LTPQQVVAIASNNGGGKQALETVQRLLPVLCQAHG  
LTPEQVVAIASHDGGKQALETVQRLLPVLCQAHG

LTPEQVVAIASNGGGRPALESIVAQLSRPDPGSKSGIYQIKNTLNNKVYVGS AKDFEKRWKRHF KDLEKGC  
HSSIKLQRSFNKHG N VFEC SILEEIPYEKDLIIERENFWIKELNSKINGYNIADATFGDTCSTHPLKEE  
IIKKRSETVKAKMLKLGPDGRKALYSKPGSKNGRWNPE THKFCKCGVRIQTSAYTCSKCRNRS GENNSFF  
NHHKSQGPSAD

> Fokl::Avr

MASGPNRGVTKQLVKSELEEKSELRHKLKYVPHEYIELIEIARNSTQDRILEMKVMEFFMKVYGYRGKH  
LGGSRKPDGAIYTVGSPIDYGVIVDTKAYSGGYNLPIGQADEMQRVVEENQTRNKHINPNEWKVPSSV  
TEFKFLFVSGHFKGNYKAQLTRLNHI TNCNGAVLSVEEL LIGGEMIKAGTTLTEE VRRKFNNGEINFGSS  
GVDLRTLGY SQQQE KIKPKV RSTVAQHHEALVGHGFTHAHIVALSQHPAALGTVAVKYQDMIAALPEAT  
HEAIVGVGKQW SGARALEALLTVAGELRGPPLQLDTGQLLKI AKRGGVTAVEAVHAWRNALTGAPLN

LTPEQVVAIASHDGGKQALETVQRLLPVLCQAHG  
LTPEQVVAIASNGGGKQALETVQRLLPVLCQAHG  
LTPEQVVAIASNI GGKQALETVQALLPVLCQAHG  
LTPEQVVAIASNGGGKQALETVQRLLPVLCQAHG  
LTPEQVVAIASNI GGKQALETVQALLPVLCQAHG  
LTPEQVVAIASNI GGKQALETVQALLPVLCQAHG  
LTPEQVVAIASNI GGKQALETVQALLPVLCQAHG  
LTPEQVVAIASHDGGKQALETVQRLLPVLCQAHG  
LTPEQVVAIASHDGGKQALETVQRLLPVLCQAHG  
LTPEQVVAIASNGGGKQALETVQRLLPVLCQAHG  
LTPEQVVAIASNI GGKQALETVQALLPVLCQAHG  
LTPEQVVAIASNI GGKQALETVQALLPVLCQAHG  
LTPEQVVAIASHDGGKQALETVQRLLPVLCQAHG  
LTPEQVVAIASHDGGKQALETVQRLLPVLCQAHG  
LTPEQVVAIASHDGGKQALETVQRLLPVLCQAHG  
LTPEQVVAIASHDGGKQALETVQRLLPVLCQAHG  
LTPEQVVAIASHDGGKQALETVQRLLPVLCQAHG  
LTPEQVVAIASHDGGKQALETVQRLLPVLCQAHG  
LTPEQVVAIASHDGGKQALETVQRLLPVLCQAHG  
LTPEQVVAIASHDGGKQALETVQRLLPVLCQAHG  
LTPEQVVAIASNGGGRPALESIVAQLSRPDPGSKSGIYQIKNTLNNKVYVGS AKDFEKRWKRHF KDLEKGC  
HSSIKLQRSFNKHG N VFEC SILEEIPYEKDLIIERENFWIKELNSKINGYNIADATFGDTCSTHPLKEE  
IIKKRSETVKAKMLKLGPDGRKALYSKPGSKNGRWNPE THKFCKCGVRIQTSAYTCSKCRNRS GENNSFF  
NHHKSQGPSAD

> Tevl::cAvr

MAKSGIYQIKNTLNNKVYVGS AKDFEKRWKRHF KDLEKGC HSSIKLQRSFNKHG N VFEC SILEEIPYEKDLIIERENFWIKELNSKINGYNIADATFGDTCSTHPLKEE  
IIKKRSETVKAKMLKLGPDGRKALYSKPGSKNGRWNPE THKFCKCGVRIQTSAYTCSKCRNRS GENNSFFNHHKSQGPSGVDLRTLGY SQQQE KIKPKV RSTVAQHHEALVGHGFTHAHIVALSQHPAALGTVAVKYQDMIAALPEAT  
HEAIVGVGKQW SGARALEALLTVAGELRGPPLQLDTGQLLKI AKRGGVTAVEAVHAWRNALTGAPLN

LTPEQVVAIASHDGGKQALETVQRLLPVLCQAHG  
LTPEQVVAIASNGGGKQALETVQRLLPVLCQAHG  
LTPEQVVAIASNI GGKQALETVQALLPVLCQAHG  
LTPEQVVAIASNGGGKQALETVQRLLPVLCQAHG  
LTPEQVVAIASNI GGKQALETVQALLPVLCQAHG  
LTPEQVVAIASNI GGKQALETVQALLPVLCQAHG  
LTPEQVVAIASNI GGKQALETVQALLPVLCQAHG  
LTPEQVVAIASHDGGKQALETVQRLLPVLCQAHG  
LTPEQVVAIASHDGGKQALETVQRLLPVLCQAHG  
LTPEQVVAIASHDGGKQALETVQRLLPVLCQAHG

LTPQQVVAIASNGGGKQALETVQRLLPVLCQAHG  
 LTPEQVVAIASNIGGKQALETVQALLPVLCQAHG  
 LTPEQVVAIASNIGGKQALETVQALLPVLCQAHG  
 LTPEQVVAIASHDGGKQALETVQRLLPVLCQAHG  
 LTPEQVVAIASHDGGKQALETVQRLLPVLCQAHG  
 LTPEQVVAIASHDGGKQALETVQRLLPVLCQAHG  
 LTPQQVVAIASNGGGKQALETVQRLLPVLCQAHG  
 LTPEQVVAIASHDGGKQALETVQRLLPVLCQAHG  
 LTPQQVVAIASNGGGRPALESIVAQLSRPDSAD

> Tevl<sub>137</sub>::cAvr

MAKSGIYQIKNTLNNKVYVGS AKDFEKRWRKRFKDLKGGCHSSIKLQRSFNKHGNVFECSILEEIPYEK  
 LIIERENFWIKELNSKINGYNIADATFGDTCSTHPLKEEIIKKRSETVKAKMLKLGPDGRKALYSKPGSG  
 VDLRTLGYSSQQQEKIKPKVRSSTVAQHHEALVGHGFTHAHIVALSQHPAALGTVAVKYQDMIAALPEATH  
 EAIIVGVGKQWSGARALEALLTVAGELRGPPLQLDTGQLLKI AKRGGVTAVEAVHAWRNAL TGAPLN  
 LTPEQVVAIASHDGGKQALETVQRLLPVLCQAHG  
 LTPQQVVAIASNGGGKQALETVQRLLPVLCQAHG  
 LTPEQVVAIASNIGGKQALETVQALLPVLCQAHG  
 LTPQQVVAIASNGGGKQALETVQRLLPVLCQAHG  
 LTPEQVVAIASNIGGKQALETVQALLPVLCQAHG  
 LTPEQVVAIASNIGGKQALETVQALLPVLCQAHG  
 LTPEQVVAIASNIGGKQALETVQALLPVLCQAHG  
 LTPEQVVAIASHDGGKQALETVQRLLPVLCQAHG  
 LTPEQVVAIASHDGGKQALETVQRLLPVLCQAHG  
 LTPQQVVAIASNGGGKQALETVQRLLPVLCQAHG  
 LTPEQVVAIASNIGGKQALETVQALLPVLCQAHG  
 LTPEQVVAIASNIGGKQALETVQALLPVLCQAHG  
 LTPEQVVAIASHDGGKQALETVQRLLPVLCQAHG  
 LTPEQVVAIASHDGGKQALETVQRLLPVLCQAHG  
 LTPEQVVAIASHDGGKQALETVQRLLPVLCQAHG  
 LTPQQVVAIASNGGGKQALETVQRLLPVLCQAHG  
 LTPEQVVAIASHDGGKQALETVQRLLPVLCQAHG  
 LTPQQVVAIASNGGGRPALESIVAQLSRPDSAD

**Supplementary Figure S6 | Sequences of TALEs used in this study.** Representative amino acid sequences for constructs that target the AvrBs3 TALE binding site. Differences in additional constructs arise solely from the number and RVD identities used to redirect the TALE DNA binding domain. Avr::FokI, standard TALEN half-construct. cAvr::Tevl, compact TALEN with Tevl fused C-terminally. FokI::Avr, TALEN half-construct with FokI fused N-terminally. Tevl::cAvr, compact TALEN with first 183 a.a. of I-Tevl fused N-terminally. Tevl<sub>137</sub>::cAvr, compact TALEN with first 137 a.a. of I-Tevl fused N-terminally. Sequences are highlighted to indicate the TALE N-terminus (gray), TALE repeats (block format, RVD in yellow), TALE C-terminus (green), linkers (magenta) and catalytic domain (red).



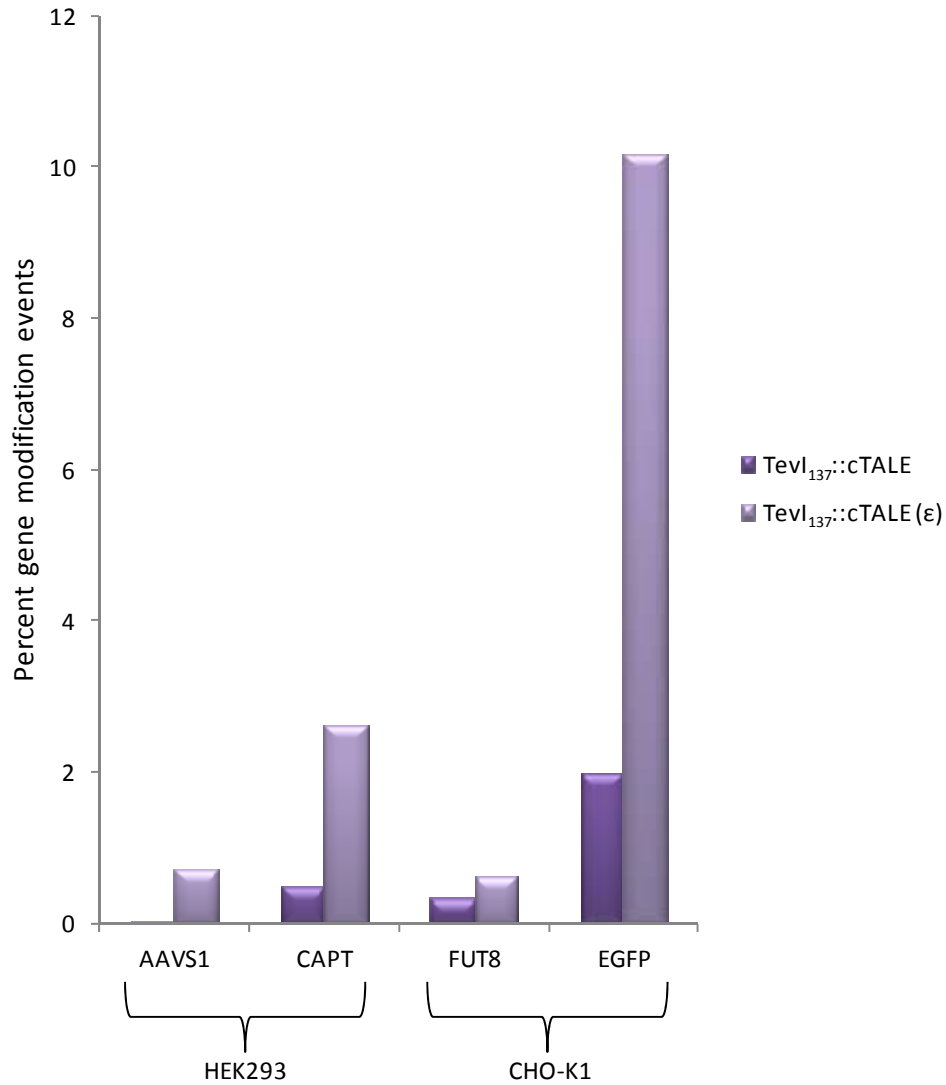

**Supplementary Figure S7 | *In vivo* characterization of Tev<sub>137</sub>-based cTALEs.** Targeted gene disruption at endogenous loci in HEK293 or CHO-K1 cells in the absence (Tev<sub>137</sub>::cTALE) or presence (Tev<sub>137</sub>::cTALE (ε)) of enhancer reagent TREX2. Appropriate cTALEN constructs were created to target endogenous regions as noted: AAVS1, adeno-associated virus integration site 1; CAPT, calpain small subunit 1; FUT8, alpha1-6-fucosyltransferase; EGFP, artificially integrated enhanced green fluorescent protein sequence expressed under the control of a CMV promoter. Gene modification events determined by amplicon sequencing of the target site. Negative controls consisting of transfection with empty vector or the TREX2 plasmid alone resulted in no detectable events.

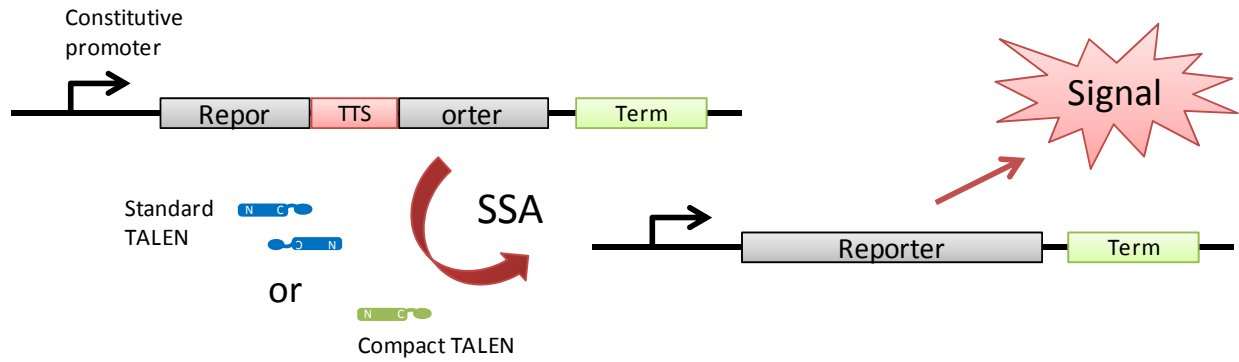

**Supplementary Figure S8 | Overview of the *in vivo* single-strand annealing (SSA) assay.** Episomal plasmid constructs containing a reporter gene, which is interrupted by a TALE target site (TTS) flanked by sequence repeats, were generated for yeast, plant and mammalian systems. Cleavage at the TTS sequence stimulates repair via SSA to create an intact gene with a detectable signal. A high-throughput yeast-based SSA assay (LacZ reporter) was adapted and used for initial screening and characterizations. Analogous systems in plant protoplasts (YFP reporter) and mammalian cells (LacZ reporter) were also developed. Where possible, a standard FokI-based TALEN targeting an identical or overlapping TTS was included to monitor comparative baseline activity.

## Supplementary Tables

Supplementary Table S1 | Relative activity\* of Tevl::TALE constructs on the 256 CNNNGN targets†

| #  | CNNNGN | Standard (37°C) |                            | Stringent (30°C) |                            |
|----|--------|-----------------|----------------------------|------------------|----------------------------|
|    |        | Tevl::cAvr      | Tevl <sub>137</sub> ::cAvr | Tevl::cAvr       | Tevl <sub>137</sub> ::cAvr |
| 1  | CAAAGA | 0.53            | 0.68                       | 0.00             | 0.16                       |
| 2  | CAAAGC | 0.70            | 0.77                       | 0.38             | 0.45                       |
| 3  | CAAAGG | 0.90            | 0.93                       | 0.59             | 0.70                       |
| 4  | CAAAGT | 0.41            | 0.65                       | 0.18             | 0.20                       |
| 5  | CAACGA | 0.54            | 0.68                       | 0.00             | 0.18                       |
| 6  | CAACGC | 0.85            | 0.91                       | 0.42             | 0.53                       |
| 7  | CAACGG | 0.96            | 0.94                       | 0.63             | 0.70                       |
| 8  | CAACGT | 0.81            | 0.92                       | 0.34             | 0.44                       |
| 9  | CAAGGA | 0.36            | 0.42                       | 0.00             | 0.00                       |
| 10 | CAAGGC | 0.44            | 0.52                       | 0.00             | 0.00                       |
| 11 | CAAGGG | 0.80            | 0.85                       | 0.41             | 0.44                       |
| 12 | CAAGGT | 0.31            | 0.38                       | 0.00             | 0.00                       |
| 13 | CAATGA | 0.70            | 0.80                       | 0.34             | 0.40                       |
| 14 | CAATGC | 0.85            | 0.90                       | 0.48             | 0.63                       |
| 15 | CAATGG | 0.87            | 0.89                       | 0.58             | 0.69                       |
| 16 | CAATGT | 0.78            | 0.90                       | 0.40             | 0.58                       |
| 17 | CACAGA | 0.17            | 0.00                       | 0.00             | 0.00                       |
| 18 | CACAGC | 0.62            | 0.62                       | 0.32             | 0.35                       |
| 19 | CACAGG | 0.90            | 0.93                       | 0.49             | 0.60                       |
| 20 | CACAGT | 0.43            | 0.64                       | 0.00             | 0.16                       |
| 21 | CACCGA | 0.40            | 0.56                       | 0.00             | 0.00                       |
| 22 | CACCGC | 0.62            | 0.73                       | 0.14             | 0.34                       |
| 23 | CACCGG | 0.88            | 0.91                       | 0.41             | 0.50                       |
| 24 | CACCGT | 0.53            | 0.70                       | 0.00             | 0.16                       |
| 25 | CACGGA | 0.34            | 0.37                       | 0.00             | 0.00                       |
| 26 | CACGGC | 0.19            | 0.20                       | 0.00             | 0.00                       |
| 27 | CACGGG | 0.73            | 0.76                       | 0.34             | 0.36                       |
| 28 | CACGGT | 0.37            | 0.42                       | 0.00             | 0.00                       |
| 29 | CACTGA | 0.37            | 0.48                       | 0.00             | 0.00                       |
| 30 | CACTGC | 0.53            | 0.67                       | 0.15             | 0.17                       |
| 31 | CACTGG | 0.82            | 0.88                       | 0.36             | 0.41                       |
| 32 | CACTGT | 0.51            | 0.70                       | 0.00             | 0.33                       |
| 33 | CAGAGA | 0.60            | 0.71                       | 0.16             | 0.17                       |
| 34 | CAGAGC | 0.76            | 0.83                       | 0.34             | 0.43                       |
| 35 | CAGAGG | 0.92            | 0.93                       | 0.57             | 0.65                       |
| 36 | CAGAGT | 0.58            | 0.74                       | 0.15             | 0.34                       |

|    |        |      |      |      |      |
|----|--------|------|------|------|------|
| 37 | CAGCGA | 0.63 | 0.76 | 0.16 | 0.35 |
| 38 | CAGCGC | 0.85 | 0.88 | 0.38 | 0.50 |
| 39 | CAGCGG | 0.95 | 0.95 | 0.57 | 0.67 |
| 40 | CAGCGT | 0.51 | 0.77 | 0.00 | 0.16 |
| 41 | CAGGGA | 0.00 | 0.17 | 0.00 | 0.00 |
| 42 | CAGGGC | 0.37 | 0.47 | 0.00 | 0.00 |
| 43 | CAGGGG | 0.72 | 0.78 | 0.33 | 0.39 |
| 44 | CAGGGT | 0.33 | 0.37 | 0.00 | 0.00 |
| 45 | CAGTGA | 0.64 | 0.79 | 0.30 | 0.36 |
| 46 | CAGTGC | 0.65 | 0.79 | 0.38 | 0.55 |
| 47 | CAGTGG | 0.95 | 0.95 | 0.65 | 0.71 |
| 48 | CAGTGT | 0.73 | 0.88 | 0.33 | 0.45 |
| 49 | CATAGA | 0.73 | 0.83 | 0.33 | 0.39 |
| 50 | CATAGC | 0.85 | 0.91 | 0.41 | 0.50 |
| 51 | CATAGG | 0.98 | 0.97 | 0.68 | 0.74 |
| 52 | CATAGT | 0.75 | 0.90 | 0.32 | 0.45 |
| 53 | CATCGA | 0.56 | 0.68 | 0.14 | 0.33 |
| 54 | CATCGC | 0.73 | 0.80 | 0.33 | 0.40 |
| 55 | CATCGG | 0.91 | 0.92 | 0.52 | 0.61 |
| 56 | CATCGT | 0.52 | 0.82 | 0.00 | 0.35 |
| 57 | CATGGA | 0.44 | 0.51 | 0.00 | 0.17 |
| 58 | CATGGC | 0.56 | 0.63 | 0.16 | 0.17 |
| 59 | CATGGG | 0.89 | 0.90 | 0.48 | 0.56 |
| 60 | CATGGT | 0.43 | 0.54 | 0.00 | 0.00 |
| 61 | CATTGA | 0.59 | 0.75 | 0.16 | 0.18 |
| 62 | CATTGC | 0.78 | 0.85 | 0.35 | 0.41 |
| 63 | CATTGG | 0.86 | 0.89 | 0.49 | 0.61 |
| 64 | CATTGT | 0.67 | 0.81 | 0.30 | 0.60 |
| 65 | CCAAGA | 0.31 | 0.32 | 0.00 | 0.00 |
| 66 | CCAAGC | 0.39 | 0.43 | 0.00 | 0.00 |
| 67 | CCAAGG | 0.82 | 0.89 | 0.37 | 0.44 |
| 68 | CCAAGT | 0.33 | 0.37 | 0.00 | 0.00 |
| 69 | CCACGA | 0.41 | 0.55 | 0.00 | 0.00 |
| 70 | CCACGC | 0.63 | 0.73 | 0.16 | 0.35 |
| 71 | CCACGG | 0.93 | 0.96 | 0.51 | 0.67 |
| 72 | CCACGT | 0.57 | 0.78 | 0.16 | 0.17 |
| 73 | CCAGGA | 0.00 | 0.00 | 0.00 | 0.00 |
| 74 | CCAGGC | 0.00 | 0.00 | 0.00 | 0.00 |
| 75 | CCAGGG | 0.44 | 0.59 | 0.13 | 0.16 |
| 76 | CCAGGT | 0.00 | 0.00 | 0.00 | 0.00 |
| 77 | CCATGA | 0.37 | 0.44 | 0.00 | 0.00 |
| 78 | CCATGC | 0.45 | 0.60 | 0.00 | 0.16 |
| 79 | CCATGG | 0.87 | 0.93 | 0.40 | 0.52 |

|     |        |      |      |      |      |
|-----|--------|------|------|------|------|
| 80  | CCATGT | 0.46 | 0.70 | 0.00 | 0.31 |
| 81  | CCCAGA | 0.00 | 0.00 | 0.00 | 0.00 |
| 82  | CCCAGC | 0.00 | 0.00 | 0.00 | 0.00 |
| 83  | CCCAGG | 0.51 | 0.64 | 0.16 | 0.32 |
| 84  | CCCAGT | 0.00 | 0.00 | 0.00 | 0.00 |
| 85  | CCCCGA | 0.00 | 0.00 | 0.00 | 0.00 |
| 86  | CCCCGC | 0.00 | 0.00 | 0.00 | 0.00 |
| 87  | CCCCGG | 0.52 | 0.62 | 0.16 | 0.16 |
| 88  | CCCCGT | 0.00 | 0.00 | 0.00 | 0.00 |
| 89  | CCCGGA | 0.00 | 0.00 | 0.00 | 0.00 |
| 90  | CCCGGC | 0.00 | 0.00 | 0.00 | 0.00 |
| 91  | CCCGGG | 0.00 | 0.35 | 0.00 | 0.00 |
| 92  | CCCGGT | 0.00 | 0.00 | 0.00 | 0.00 |
| 93  | CCCTGA | 0.00 | 0.00 | 0.00 | 0.00 |
| 94  | CCCTGC | 0.00 | 0.00 | 0.00 | 0.00 |
| 95  | CCCTGG | 0.46 | 0.62 | 0.00 | 0.00 |
| 96  | CCCTGT | 0.00 | 0.00 | 0.00 | 0.00 |
| 97  | CCGAGA | 0.00 | 0.00 | 0.00 | 0.00 |
| 98  | CCGAGC | 0.33 | 0.34 | 0.00 | 0.00 |
| 99  | CCGAGG | 0.62 | 0.73 | 0.28 | 0.32 |
| 100 | CCGAGT | 0.00 | 0.00 | 0.00 | 0.00 |
| 101 | CCGCGA | 0.00 | 0.35 | 0.00 | 0.00 |
| 102 | CCGCGC | 0.38 | 0.49 | 0.00 | 0.00 |
| 103 | CCGCGG | 0.73 | 0.84 | 0.31 | 0.35 |
| 104 | CCGCGT | 0.34 | 0.46 | 0.00 | 0.00 |
| 105 | CCGGGA | 0.00 | 0.00 | 0.00 | 0.00 |
| 106 | CCGGGC | 0.00 | 0.00 | 0.00 | 0.00 |
| 107 | CCGGGG | 0.36 | 0.38 | 0.00 | 0.00 |
| 108 | CCGGGT | 0.00 | 0.00 | 0.00 | 0.00 |
| 109 | CCGTGA | 0.31 | 0.34 | 0.00 | 0.00 |
| 110 | CCGTGC | 0.36 | 0.43 | 0.00 | 0.00 |
| 111 | CCGTGG | 0.75 | 0.84 | 0.31 | 0.37 |
| 112 | CCGTGT | 0.33 | 0.44 | 0.00 | 0.00 |
| 113 | CCTAGA | 0.00 | 0.18 | 0.00 | 0.00 |
| 114 | CCTAGC | 0.42 | 0.46 | 0.00 | 0.00 |
| 115 | CCTAGG | 0.79 | 0.87 | 0.32 | 0.37 |
| 116 | CCTAGT | 0.17 | 0.41 | 0.00 | 0.00 |
| 117 | CCTCGA | 0.31 | 0.36 | 0.00 | 0.00 |
| 118 | CCTCGC | 0.37 | 0.48 | 0.00 | 0.00 |
| 119 | CCTCGG | 0.74 | 0.83 | 0.31 | 0.38 |
| 120 | CCTCGT | 0.36 | 0.52 | 0.00 | 0.00 |
| 121 | CCTGGA | 0.00 | 0.00 | 0.00 | 0.00 |
| 122 | CCTGGC | 0.00 | 0.00 | 0.00 | 0.00 |

|     |        |      |      |      |      |
|-----|--------|------|------|------|------|
| 123 | CCTGGG | 0.48 | 0.60 | 0.00 | 0.00 |
| 124 | CCTGGT | 0.00 | 0.00 | 0.00 | 0.00 |
| 125 | CCTTGA | 0.18 | 0.37 | 0.00 | 0.00 |
| 126 | CCTTGC | 0.37 | 0.47 | 0.00 | 0.00 |
| 127 | CCTTGG | 0.73 | 0.86 | 0.31 | 0.36 |
| 128 | CCTTGT | 0.34 | 0.49 | 0.00 | 0.00 |
| 129 | CGAAGA | 0.32 | 0.35 | 0.00 | 0.00 |
| 130 | CGAAGC | 0.36 | 0.43 | 0.00 | 0.00 |
| 131 | CGAAGG | 0.78 | 0.85 | 0.34 | 0.42 |
| 132 | CGAAGT | 0.00 | 0.00 | 0.00 | 0.00 |
| 133 | CGACGA | 0.40 | 0.53 | 0.00 | 0.00 |
| 134 | CGACGC | 0.59 | 0.71 | 0.29 | 0.31 |
| 135 | CGACGG | 0.92 | 0.94 | 0.43 | 0.54 |
| 136 | CGACGT | 0.48 | 0.71 | 0.00 | 0.16 |
| 137 | CGAGGA | 0.00 | 0.00 | 0.00 | 0.00 |
| 138 | CGAGGC | 0.00 | 0.00 | 0.00 | 0.00 |
| 139 | CGAGGG | 0.56 | 0.62 | 0.00 | 0.00 |
| 140 | CGAGGT | 0.00 | 0.00 | 0.00 | 0.00 |
| 141 | CGATGA | 0.39 | 0.51 | 0.00 | 0.00 |
| 142 | CGATGC | 0.50 | 0.60 | 0.00 | 0.00 |
| 143 | CGATGG | 0.79 | 0.83 | 0.33 | 0.41 |
| 144 | CGATGT | 0.43 | 0.65 | 0.00 | 0.00 |
| 145 | CGCAGA | 0.00 | 0.00 | 0.00 | 0.00 |
| 146 | CGCAGC | 0.16 | 0.00 | 0.00 | 0.00 |
| 147 | CGCAGG | 0.60 | 0.67 | 0.16 | 0.16 |
| 148 | CGCAGT | 0.00 | 0.00 | 0.00 | 0.00 |
| 149 | CGCCGA | 0.00 | 0.00 | 0.00 | 0.00 |
| 150 | CGCCGC | 0.00 | 0.00 | 0.00 | 0.00 |
| 151 | CGCCGG | 0.59 | 0.68 | 0.00 | 0.17 |
| 152 | CGCCGT | 0.00 | 0.00 | 0.00 | 0.00 |
| 153 | CGCGGA | 0.00 | 0.00 | 0.00 | 0.00 |
| 154 | CGCGGC | 0.00 | 0.00 | 0.00 | 0.00 |
| 155 | CGCGGG | 0.00 | 0.00 | 0.00 | 0.00 |
| 156 | CGCGGT | 0.00 | 0.00 | 0.00 | 0.00 |
| 157 | CGCTGA | 0.00 | 0.00 | 0.00 | 0.00 |
| 158 | CGCTGC | 0.18 | 0.00 | 0.00 | 0.00 |
| 159 | CGCTGG | 0.44 | 0.55 | 0.00 | 0.00 |
| 160 | CGCTGT | 0.00 | 0.18 | 0.00 | 0.00 |
| 161 | CGGAGA | 0.37 | 0.00 | 0.00 | 0.00 |
| 162 | CGGAGC | 0.38 | 0.37 | 0.00 | 0.00 |
| 163 | CGGAGG | 0.75 | 0.79 | 0.32 | 0.33 |
| 164 | CGGAGT | 0.00 | 0.00 | 0.00 | 0.00 |
| 165 | CGGCGA | 0.00 | 0.00 | 0.00 | 0.00 |

|     |        |      |      |      |      |
|-----|--------|------|------|------|------|
| 166 | CGGCGC | 0.37 | 0.42 | 0.00 | 0.00 |
| 167 | CGGCGG | 0.67 | 0.73 | 0.31 | 0.31 |
| 168 | CGGCGT | 0.34 | 0.40 | 0.00 | 0.00 |
| 169 | CGGGGA | 0.00 | 0.00 | 0.00 | 0.00 |
| 170 | CGGGGC | 0.00 | 0.00 | 0.00 | 0.00 |
| 171 | CGGGGG | 0.00 | 0.00 | 0.00 | 0.00 |
| 172 | CGGGGT | 0.00 | 0.00 | 0.00 | 0.00 |
| 173 | CGGTGA | 0.42 | 0.38 | 0.00 | 0.00 |
| 174 | CGGTGC | 0.44 | 0.45 | 0.00 | 0.00 |
| 175 | CGGTGG | 0.65 | 0.71 | 0.30 | 0.36 |
| 176 | CGGTGT | 0.37 | 0.40 | 0.00 | 0.00 |
| 177 | CGTAGA | 0.37 | 0.41 | 0.00 | 0.00 |
| 178 | CGTAGC | 0.46 | 0.52 | 0.00 | 0.00 |
| 179 | CGTAGG | 0.84 | 0.89 | 0.36 | 0.42 |
| 180 | CGTAGT | 0.37 | 0.50 | 0.00 | 0.00 |
| 181 | CGTCGA | 0.40 | 0.39 | 0.00 | 0.00 |
| 182 | CGTCGC | 0.41 | 0.51 | 0.00 | 0.00 |
| 183 | CGTCGG | 0.76 | 0.83 | 0.34 | 0.36 |
| 184 | CGTCGT | 0.40 | 0.54 | 0.00 | 0.00 |
| 185 | CGTGGA | 0.00 | 0.00 | 0.00 | 0.00 |
| 186 | CGTGGC | 0.00 | 0.00 | 0.00 | 0.00 |
| 187 | CGTGGG | 0.52 | 0.57 | 0.00 | 0.00 |
| 188 | CGTGGT | 0.00 | 0.00 | 0.00 | 0.00 |
| 189 | CGTTGA | 0.00 | 0.37 | 0.00 | 0.00 |
| 190 | CGTTGC | 0.43 | 0.50 | 0.00 | 0.00 |
| 191 | CGTTGG | 0.69 | 0.78 | 0.31 | 0.34 |
| 192 | CGTTGT | 0.39 | 0.58 | 0.00 | 0.00 |
| 193 | CTAAGA | 0.43 | 0.51 | 0.00 | 0.00 |
| 194 | CTAAGC | 0.59 | 0.67 | 0.00 | 0.00 |
| 195 | CTAAGG | 0.81 | 0.86 | 0.46 | 0.52 |
| 196 | CTAAGT | 0.37 | 0.49 | 0.00 | 0.00 |
| 197 | CTACGA | 0.64 | 0.75 | 0.30 | 0.35 |
| 198 | CTACGC | 0.80 | 0.85 | 0.36 | 0.43 |
| 199 | CTACGG | 0.92 | 0.93 | 0.64 | 0.74 |
| 200 | CTACGT | 0.74 | 0.82 | 0.32 | 0.44 |
| 201 | CTAGGA | 0.00 | 0.00 | 0.00 | 0.00 |
| 202 | CTAGGC | 0.17 | 0.18 | 0.00 | 0.00 |
| 203 | CTAGGG | 0.62 | 0.67 | 0.16 | 0.17 |
| 204 | CTAGGT | 0.00 | 0.00 | 0.00 | 0.00 |
| 205 | CTATGA | 0.58 | 0.70 | 0.16 | 0.17 |
| 206 | CTATGC | 0.77 | 0.86 | 0.35 | 0.40 |
| 207 | CTATGG | 0.93 | 0.94 | 0.54 | 0.65 |
| 208 | CTATGT | 0.68 | 0.87 | 0.32 | 0.40 |

|     |        |      |      |      |      |
|-----|--------|------|------|------|------|
| 209 | CTCAGA | 0.00 | 0.00 | 0.00 | 0.00 |
| 210 | CTCAGC | 0.38 | 0.41 | 0.00 | 0.00 |
| 211 | CTCAGG | 0.76 | 0.81 | 0.33 | 0.37 |
| 212 | CTCAGT | 0.00 | 0.38 | 0.00 | 0.00 |
| 213 | CTCCGA | 0.00 | 0.00 | 0.00 | 0.00 |
| 214 | CTCCGC | 0.49 | 0.50 | 0.00 | 0.00 |
| 215 | CTCCGG | 0.69 | 0.79 | 0.34 | 0.36 |
| 216 | CTCCGT | 0.42 | 0.49 | 0.00 | 0.00 |
| 217 | CTCGGA | 0.00 | 0.00 | 0.00 | 0.00 |
| 218 | CTCGGC | 0.00 | 0.00 | 0.00 | 0.00 |
| 219 | CTCGGG | 0.47 | 0.49 | 0.16 | 0.17 |
| 220 | CTCGGT | 0.00 | 0.00 | 0.00 | 0.00 |
| 221 | CTCTGA | 0.00 | 0.00 | 0.00 | 0.00 |
| 222 | CTCTGC | 0.39 | 0.48 | 0.00 | 0.00 |
| 223 | CTCTGG | 0.65 | 0.75 | 0.16 | 0.35 |
| 224 | CTCTGT | 0.00 | 0.44 | 0.00 | 0.00 |
| 225 | CTGAGA | 0.40 | 0.46 | 0.00 | 0.00 |
| 226 | CTGAGC | 0.54 | 0.61 | 0.16 | 0.17 |
| 227 | CTGAGG | 0.87 | 0.92 | 0.41 | 0.47 |
| 228 | CTGAGT | 0.38 | 0.46 | 0.00 | 0.00 |
| 229 | CTGCGA | 0.46 | 0.59 | 0.00 | 0.00 |
| 230 | CTGCGC | 0.67 | 0.74 | 0.32 | 0.35 |
| 231 | CTGCGG | 0.85 | 0.89 | 0.45 | 0.53 |
| 232 | CTGCGT | 0.56 | 0.70 | 0.00 | 0.35 |
| 233 | CTGGGA | 0.00 | 0.00 | 0.00 | 0.00 |
| 234 | CTGGGC | 0.00 | 0.00 | 0.00 | 0.00 |
| 235 | CTGGGG | 0.53 | 0.60 | 0.00 | 0.00 |
| 236 | CTGGGT | 0.00 | 0.00 | 0.00 | 0.00 |
| 237 | CTGTGA | 0.42 | 0.56 | 0.00 | 0.00 |
| 238 | CTGTGC | 0.56 | 0.70 | 0.31 | 0.34 |
| 239 | CTGTGG | 0.86 | 0.90 | 0.44 | 0.55 |
| 240 | CTGTGT | 0.58 | 0.78 | 0.00 | 0.37 |
| 241 | CTTAGA | 0.41 | 0.50 | 0.00 | 0.00 |
| 242 | CTTAGC | 0.59 | 0.61 | 0.00 | 0.16 |
| 243 | CTTAGG | 0.84 | 0.86 | 0.40 | 0.50 |
| 244 | CTTAGT | 0.50 | 0.68 | 0.00 | 0.17 |
| 245 | CTTCGA | 0.39 | 0.53 | 0.00 | 0.00 |
| 246 | CTTCGC | 0.60 | 0.70 | 0.30 | 0.33 |
| 247 | CTTCGG | 0.83 | 0.87 | 0.39 | 0.50 |
| 248 | CTTCGT | 0.55 | 0.77 | 0.00 | 0.33 |
| 249 | CTTGGA | 0.00 | 0.00 | 0.00 | 0.00 |
| 250 | CTTGGC | 0.00 | 0.00 | 0.00 | 0.00 |
| 251 | CTTGGG | 0.66 | 0.71 | 0.31 | 0.36 |



|     |        |      |      |      |      |
|-----|--------|------|------|------|------|
| 252 | CTTGGT | 0.00 | 0.00 | 0.00 | 0.00 |
| 253 | CTTTGA | 0.35 | 0.44 | 0.00 | 0.00 |
| 254 | CTTTGC | 0.48 | 0.56 | 0.00 | 0.00 |
| 255 | CTTTGG | 0.79 | 0.87 | 0.33 | 0.38 |
| 256 | CTTTGT | 0.46 | 0.68 | 0.00 | 0.17 |

\*Values represent the average of experiments performed in duplicate at either 37°C or 30°C.

†Base target sequence: acttatCNNNGNataccgatatTATATAAACCTAACCTCT

with the degenerated *NotI* target site (red) and TALE DNA binding site (green) indicated in uppercase.
